# Supplementary material
Source: PubMed Central journal article supplement (PMC3062162)

**Supplementary Tables:**

**Supplementary Table 1: TFPI2 Primers used for MSP, BSS, RT and Stool DNA methylation assay**

|                                                       | Sense                              | Antisense                         | Size | Strand |
|-------------------------------------------------------|------------------------------------|-----------------------------------|------|--------|
| TFPI2                                                 |                                    |                                   |      |        |
| MSP1 U                                                | GTGGTGGGGTGATAGTTTTTG              | CCAAACAACCCAAATACCCACTTTATACA     | 109  | 1      |
| MSP1 M                                                | CGGCGGGGTGATAGTTTTC                | CAAACGACCCGAATACCCGCTTTATACG      | 106  | 1      |
| MSP2* U                                               | CCCACATAAAACAACACCCAAACCA          | TGGTTTGTGGGTAAGGTGTTTG            | 93   | 2      |
| MSP2* M                                               | GTTTCGTTGGGTAAGGCGTTC              | CATAAAACGAACACCCGAACCG            | 86   | 2      |
| * Primer set used for MSP in FFPE and frozen samples. |                                    |                                   |      |        |
| MSP3 U                                                | AAGTTGTGATTTTTTTTTGTTAGGTGTTTTTTTG | AACAAACAAAATCCATAATACAAAAATCAAACA | 88   | 1      |
| MSP3 M                                                | CGTATTTTTTTTCGTTAGGCGTTTTTTTC      | CGAAATCCATAATACAAAAATCGAACG       | 75   | 1      |
| MSP4 U                                                | GGGTTTTGTGTAGGTGTTTTTAAGTTTTG      | CCCCCTACCAACAAAACACA              | 70   | 1      |
| MSP4 M                                                | GGGTTTCGTGTAGGCGTTTTTTAAGTTTC      | CCCTACCAACGAAACGCG                | 67   | 1      |
| BSS                                                   | GGTTTATGGTGTAGGGG                  | CAATCACTAACAAATCATTTC             |      | 2      |
| RT TFPI2                                              | GGGCCCTACTTCTCCGTTAC               | CACACTGGTCGTCCCACTC               | 183  |        |
| ACTB                                                  | CATCCACGAAACTACCTTCAACTCC          | GAGCCGCCGATCCACACG                | 213  |        |
| HPRT                                                  | CTTTGCTGACCTGCTGGATT               | GTTGAGAGATCATCTCCACC              | 150  |        |

**Stool DNA methylation assay**

Nested primers used for pilot feasibility study

|              |                              |                             |     |   |
|--------------|------------------------------|-----------------------------|-----|---|
| #Flank MSP 5 | GTGTATGAATTAGTTATTTTTTAGGTTT | CTAAACAAAACRTCCRAAAAAAC     | 144 | 1 |
| MSP5# U      | TTAGTTATTTTTAGGTTTTGTTTTGGT  | AAAAACACCTAACAAAAAAAATACACA | 118 | 1 |
| MSP5# M      | ATTTTTTAGGTTTCGTTTCGGC       | GCCTAACGAAAAAAAATACGCG      | 106 | 1 |

Primers for quantitative MSP (qMSP)

|                  |                                                    |                        |    |   |
|------------------|----------------------------------------------------|------------------------|----|---|
| TFPI2_qMSP       | GTTTCGTTGGGTAAGGCGTTC                              | CATAAAACGAACACCCGAACCG | 87 | 2 |
| Molecular beacon | FAM—CGACATGCACCGCGCACCTCCTCCCGCCAAGCATGTCTG—DABCYL |                        |    |   |

## **Supplementary Figure Legends:**

**Supplementary Figure 1:** Epigenetic inactivation of TFPI2 in DKO. Gene expression changes are plotted by fold change (log scale) in DKO (Y-axis) compared to its parental cell line Hct116 (X-axis) treatment. TFPI2 expression increases 4.47 in log<sub>2</sub> ratio (=22.12 fold) in DKO compared to HCT116 Mock. □ indicates the location of TFPI2 in the scatter plot.

**Supplementary Figure 2:** Bar graph showing methylation frequency of TFPI2 in various cultured cancer cell lines. □U=unmethylated; PM = partially methylated; □M=methylated

**Supplementary Figure 3:** Line diagram (A) and bar graph (B) showing cell growth in mock, empty vector and *TFPI2* transfected HCT116 cells. There is no difference in cell survival between mock and empty vector transfected cells. *TFPI2* transfected cells show a 20% decrease in cell survival.

**Supplementary Figure 4:** Graphic representation of overlap between hypermethylation of HCT116 as determined by Schuebel *et. al.* (10) with PcG-targeted genes according to Bracken *et. al.* (22) in gene pool represented on Agilent 4x44k array platform.

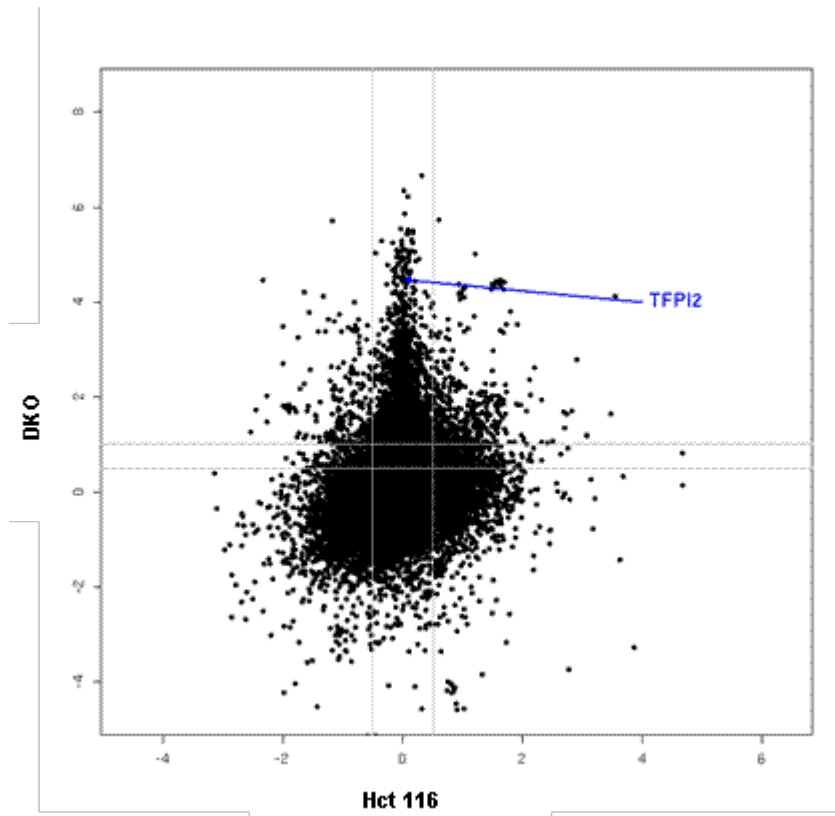

Supplementary Figure 1  
Glockner et al.

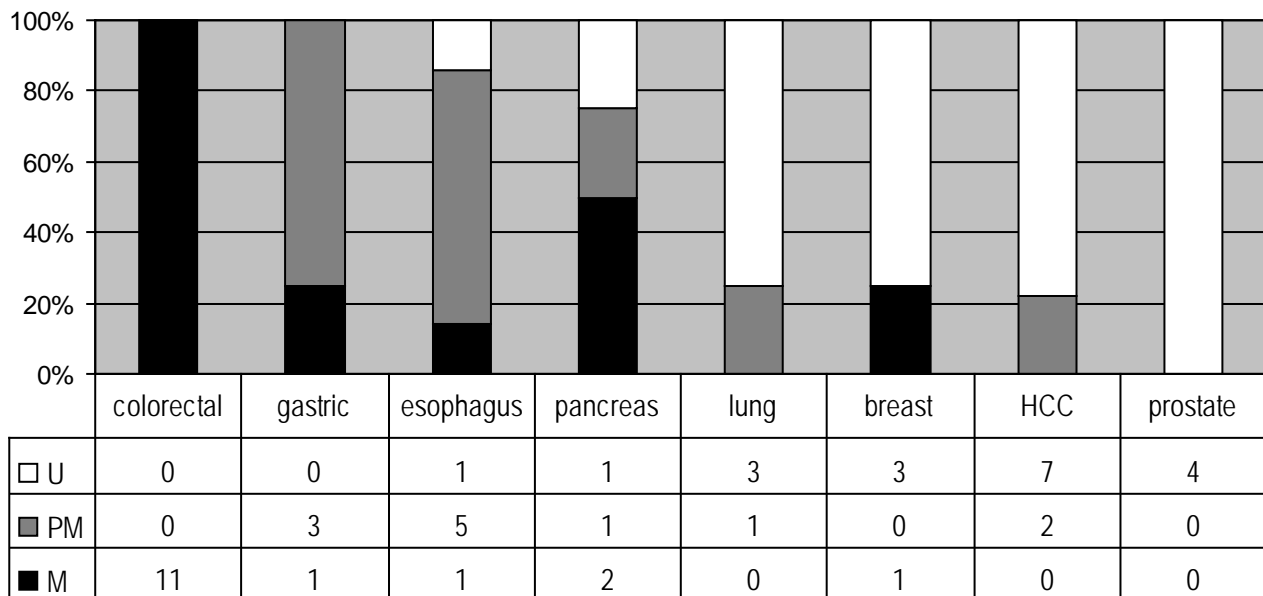

Supplementary Figure 2  
Glockner et al.

3A

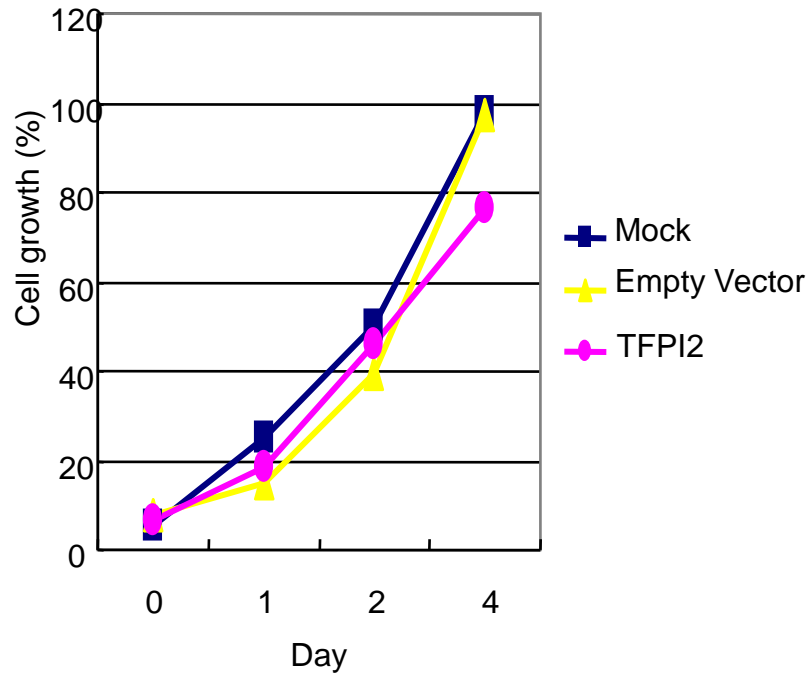

3B

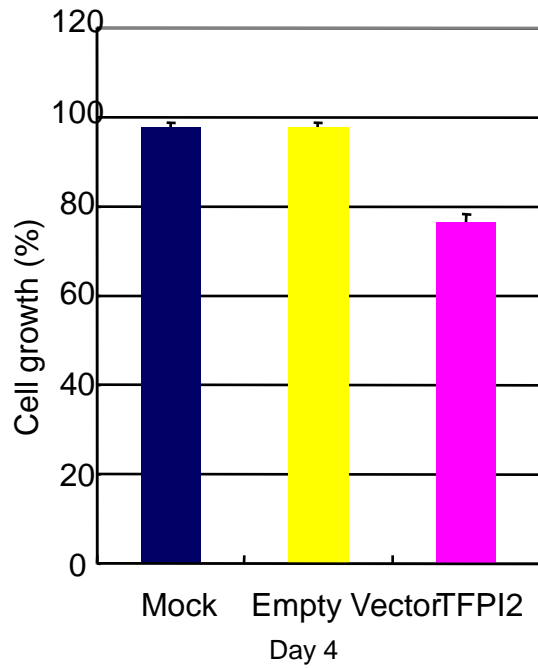

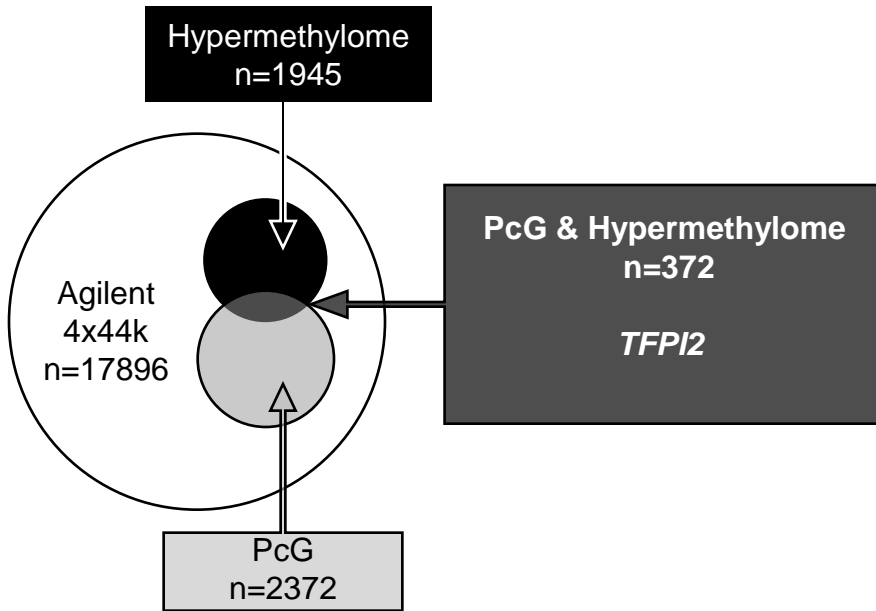

Supplement: NIHMS280692-supplement-Suppl_Data.pdf [file NIHMS280692-supplement-Suppl_Data.pdf]
